# **The CDK8 inhibitor DCA promotes a tolerogenic chemical immunophenotype in CD4<sup>+</sup> T cells via a novel CDK8-GATA3-FOXP3 pathway.**

## **Authors**

Azlann Arnett<sup>1</sup>, Keagan G Moo<sup>1</sup>, Kaitlin J Flynn<sup>1</sup>, Thomas B Sundberg<sup>2</sup>, Liv Johannessen<sup>3</sup>, Alykhan F Shamji<sup>2</sup>, Nathanael S Gray<sup>3</sup>, Thomas Decker<sup>4</sup>, Ye Zheng<sup>5</sup>, Vivian H Gersuk<sup>1</sup>, David E Levy<sup>6</sup>, Isabelle J Marié<sup>6</sup>, Ziaur S Rahman<sup>7</sup>, Peter S Linsley<sup>1</sup>, Ramnik J Xavier<sup>8,9</sup>, Bernard Khor<sup>#1</sup>

## **Affiliations**

<sup>1</sup>Benaroya Research Institute, 1201 9th Ave, Seattle, WA 98101, USA.

<sup>2</sup>Center for the Science of Therapeutics, Broad Institute, 415 Main St, Cambridge, MA 02142, USA.

<sup>3</sup>Department of Biological Chemistry and Molecular Pharmacology, Harvard Medical School, 25 Shattuck St, Boston, MA 02115, USA.

<sup>4</sup>Max Perutz Labs, University of Vienna, Dr.-Bohr-Gasse 9, 1030 Wien, Vienna, Austria.

<sup>5</sup>NOMIS Center for Immunobiology and Microbial Pathogenesis, Salk Institute for Biological Studies, 10010 N Torrey Pines Rd, La Jolla, CA 92037, USA.

<sup>6</sup>Department of Pathology, New York University School of Medicine, 550 1st Avenue, New York, NY 10016, USA.

<sup>7</sup>Department of Microbiology and Immunology, Pennsylvania State University College of Medicine, 500 University Drive, Hershey, PA 17033, USA.

<sup>8</sup>Center for Computational and Integrative Biology, Massachusetts General Hospital, Harvard Medical School, 55 Fruit St, Boston, MA 02114, USA.

<sup>9</sup>The Broad Institute of Massachusetts Institute of Technology and Harvard, 415 Main St, Cambridge, MA 02142, USA.

Running Head: T cell differentiation regulated by CDK8-GATA3-FOXP3

#Address correspondence to Bernard Khor, [bkhor@benaroyaresearch.org](mailto:bkhor@benaroyaresearch.org)

Word count: Abstract (156); Introduction, Results, and Discussion (3,753); Methods (2,554)

## 29 **Abstract**

30 Immune health requires innate and adaptive immune cells to engage precisely balanced pro- and  
 31 anti-inflammatory forces. We employ the concept of chemical immunophenotypes to classify  
 32 small molecules functionally or mechanistically according to their patterns of effects on primary  
 33 innate and adaptive immune cells. The high-specificity, low-toxicity cyclin dependent kinase 8  
 34 (CDK8) inhibitor DCA exerts a distinct tolerogenic profile in both innate and adaptive immune  
 35 cells. DCA promotes T<sub>reg</sub> and Th2 differentiation, while inhibiting Th1 and Th17 differentiation,  
 36 in both murine and human cells. This unique chemical immunophenotype led to mechanistic  
 37 studies showing that DCA promotes T<sub>reg</sub> differentiation in part by regulating a previously  
 38 undescribed CDK8-GATA3-FOXP3 pathway that regulates early pathways of Foxp3 expression.  
 39 These results highlight previously unappreciated links between T<sub>reg</sub> and Th2 differentiation and  
 40 extend our understanding of the transcription factors that regulate T<sub>reg</sub> differentiation and their  
 41 temporal sequencing. These findings have significant implications for future mechanistic and  
 42 translational studies of CDK8 and CDK8 inhibitors.

43

44

## 45 MAIN TEXT

### 46 Introduction

47 The immune system comprises innate and adaptive immune cells whose collaborative and  
 48 coordinated responses maintain the healthy state. Each cell type can exert either pro- or anti-  
 49 inflammatory forces. For example, innate immune cells can secrete either pro- (e.g. IFN $\gamma$ ) or anti-  
 50 (e.g. IL-10) inflammatory cytokines; similarly, CD4<sup>+</sup> T cells can differentiate into either pro- (e.g.  
 51 Th1, Th17) or anti- (T<sub>reg</sub>) inflammatory subsets (1-5). These pro- and anti- inflammatory forces  
 52 must be precisely balanced; dysregulation of this balance can predispose to autoimmunity,  
 53 infection or cancer (3, 6).

54  
 55 We have previously demonstrated how small molecules can highlight novel pathways of  
 56 immunoregulation in primary immune cells. For example, we showed that small molecule  
 57 inhibition of the dual-specificity tyrosine phosphorylation-regulated kinase 1A (DYRK1A)  
 58 promotes differentiation of murine and human CD4<sup>+</sup> T cells into T<sub>reg</sub>s (7). We also showed that  
 59 small molecule inhibition of salt-induced kinases (SIKs) enhanced production of IL-10 by murine  
 60 and human myeloid cells (8). However, a comprehensive understanding of how both innate and  
 61 adaptive immune cell function is modulated remains lacking for most small molecules.

62  
 63 Here, we investigate the effect of the natural product-derived small molecule dihydro-  
 64 cortistatin A (DCA) on murine and human CD4<sup>+</sup> T cells. Recent studies pointing to DCA as the  
 65 CDK8 inhibitor with highest specificity and lowest toxicity highlight DCA as a CDK8 inhibitor  
 66 of critical interest (9). CDK8 is an essential component of the CDK8 submodule of the Mediator  
 67 coactivator complex, which regulates RNA polymerase II activity (10, 11). The CDK8 submodule  
 68 facultatively binds the Mediator complex, phosphorylates transcription factors and regulates  
 69 specific pathways (11-13). CDK8 phosphorylates several immune-relevant transcription factors,

including STAT1<sup>Ser727</sup>, STAT3<sup>Ser727</sup>, STAT5<sup>Ser730</sup>, c-Jun<sup>Ser243</sup> and Notch (*14-19*). CDK8 regulates both innate and adaptive immune responses and CDK8 inhibition typically exerts tolerogenic effects. We previously found that DCA promotes production of IL-10 in myeloid cells by inhibiting cyclin-dependent kinase 8 (CDK8) (*20-22*). Additionally, CDK8 deletion in innate immune NK cells improves tumor surveillance while in adaptive immune cells, CDK8/19 inhibitors promote T<sub>reg</sub> differentiation (*18, 22-25*). Recent findings that CDK8 inhibition promotes Th17 differentiation suggest the first pro-inflammatory sequelae (*26*). How CDK8 regulates differentiation to other T cell lineages (Th1 and Th2) remains less clear. Furthermore, much of the mechanistic work in T cells has focused on CDK8 phosphorylation of STAT5 and STAT3. The possibility of additional CDK8-regulated pathways in the context of T cell biology is suggested by our findings that CDK8 regulates myeloid cells by c-Jun<sup>Ser243</sup> phosphorylation; however, the identity of these pathways remains incompletely elucidated (*22*). Understanding these pathways is essential to identify the patients who might most benefit from CDK8 inhibition therapy.

We demonstrate that DCA exerts a unique pattern of immunomodulation (i.e. chemical immunophenotype) compared to other known immunomodulatory small molecules. Using both small molecule inhibitors and CRISPR/Cas9 knockdown, we find that DCA inhibits CDK8 to promote the differentiation of both T<sub>reg</sub> and Th2 cells while suppressing the differentiation of pro-inflammatory Th1 and Th17 subsets. We show that DCA-driven T<sub>reg</sub>s are fully suppressive in the absence of concomitant tolerogenic effects on innate immune cells. Mechanistically, CDK8 inhibition by DCA regulates T<sub>reg</sub>/Th17/Th1 differentiation independent of effects on STAT1/STAT3 Ser727 phosphorylation. Notably, DCA's unusual chemical immunophenotype directly leads us to find that DCA uniquely drives early temporal expression of *FOXP3* at least in part via a CDK8-GATA3-FOXP3 pathway not previously described to regulate T<sub>reg</sub>

95 differentiation. These findings further our mechanistic understanding of an emerging role for  
96 DCA as an immunomodulator that broadly drives tolerogenic programs in both innate and  
97 adaptive immune cells. These findings are discussed in the context of implications to future  
98 therapeutic use of CDK8 inhibitors.

## 99 Results

### 101 DCA exerts tolerogenic effects on murine and human CD4<sup>+</sup> T cell differentiation

102 Given our previous observation that DCA promotes tolerogenic IL-10 production in innate  
 103 immune cells, we determined whether DCA exerts tolerogenic effects on CD4<sup>+</sup> T cell  
 104 differentiation (22). We tested the effect of DCA on naïve murine CD4<sup>+</sup> T cells cultured in  
 105 suboptimal pro-T<sub>reg</sub> or -Th2 conditions (T<sub>reg</sub><sup>low</sup> and Th2<sup>low</sup>, respectively) as we previously  
 106 described (7). DCA enhanced differentiation of both T<sub>reg</sub> and Th2 cells (Fig. 1A). DCA increased  
 107 T<sub>reg</sub>s specifically in cultures of FACS-sorted naïve CD4<sup>+</sup> T cells, but not sorted T<sub>reg</sub>s, further  
 108 demonstrating that the increase in T<sub>reg</sub>s is due to enhanced differentiation of T<sub>reg</sub>s rather than  
 109 expansion of existing T<sub>reg</sub>s (Fig. S1A). To examine if these tolerogenic effects extended to  
 110 inhibiting differentiation of pro-inflammatory T cell lineages, we added DCA to murine T cells  
 111 cultured in near-optimal pro-Th1 and -Th17 conditions (Th1<sup>hi</sup> and Th17<sup>hi</sup>, respectively). DCA  
 112 significantly inhibited differentiation of Th1 and Th17 cells (Fig. 1B). Notably, DCA promoted  
 113 differentiation of T<sub>reg</sub> and Th2 cells even in near-optimal Th17<sup>hi</sup> and Th1<sup>hi</sup> conditions respectively  
 114 (Fig. 1B, FACS plots). In the context of non-polarizing Th0 conditions, DCA significantly, albeit  
 115 modestly, enhanced murine T<sub>reg</sub> and Th2 differentiation (Fig. 1C). Th1 differentiation was slightly  
 116 reduced below the level of statistical significance and Th17 cells were too infrequent to accurately  
 117 assess (Fig. 1C). These results suggest that DCA can enhance T<sub>reg</sub>/Th2 differentiation in the  
 118 absence of exogenous cytokines. Therefore, DCA exerts powerful and broad tolerogenic effects  
 119 on murine T cell differentiation.

121 We next investigated whether DCA similarly affects human T<sub>reg</sub> and Th2 differentiation  
 122 by culturing human CD4<sup>+</sup> T cells in (human-specific) suboptimal T<sub>reg</sub><sup>low</sup> and Th2<sup>low</sup> conditions  
 123 respectively. DCA treatment enhanced both T<sub>reg</sub> and Th2 differentiation in human CD4<sup>+</sup> T cells,  
 124 pointing to concordant regulation in human and murine cells (Fig. 1D-F). We benchmarked the

25 pro- $T_{reg}$  effect of DCA against the well-described  $T_{reg}$  enhancers all-trans retinoic acid (ATRA)  
 26 and rapamycin (RAPA) (27-33). In murine and human  $CD4^+$  T cells cultured in suboptimal  $T_{reg}^{low}$   
 27 conditions, DCA treatment enhanced the total number of  $T_{regs}$  significantly higher than either  
 28 ATRA or rapamycin (Fig. 1D). In addition, DCA enhanced the percentage of  $T_{regs}$  to a level  
 29 similar to ATRA and rapamycin (Fig. 1E). These results highlight that DCA potently enhances  
 30  $T_{reg}$  differentiation in both murine and human T cells and reflect in part the lower cytotoxicity of  
 31 DCA compared to ATRA and rapamycin (Fig. S1B).

32

### 33 **DCA identifies a novel CDK8 inhibition-driven chemical immunophenotype**

34 We compared DCA's profile of tolerogenic effects against that of other tolerogenic  
 35 compounds. We investigated the dose-response of murine  $CD4^+$  T cells to DCA and two other  
 36 tolerogenic small molecules in the context of suboptimal pro- $T_{reg}$ , Th2, Th1 and Th17 conditions  
 37 ( $T_{reg}^{low}$ , Th2<sup>low</sup>, Th1<sup>low</sup> and Th17<sup>low</sup>, respectively) (7). These experiments showed that DCA  
 38 enhanced differentiation of both murine  $T_{reg}$  and Th2 cells with identical  $EC_{50}$  (dose exerting half-  
 39 maximal effect), supporting the involvement of a common mechanistic target (Fig. 2A). We  
 40 wanted to understand if DCA's ability to enhance  $T_{reg}$  and Th2 differentiation and myeloid IL-10  
 41 production represent a pattern common to many tolerogenic small molecules. We tested harmine,  
 42 which we previously identified as a potent enhancer of  $T_{reg}$  differentiation, and found that  
 43 harmine enhanced the differentiation of  $T_{reg}$ , but not Th2, cells (Fig. 2A) (7). We also tested HG-  
 44 9-91-01, which we previously showed enhances myeloid cell production of IL-10 production by  
 45 inhibiting salt-inducible kinase (SIK) 1-3, and found that HG-9-91-01 enhanced neither  $T_{reg}$  nor  
 46 Th2 differentiation (Fig. 2A) (8). Therefore, DCA, HG-9-91-01 and harmine exert distinct  
 47 immune phenotypic profiles, which we term chemical immunophenotypes, reflecting engagement  
 48 of distinct pathways regulating tolerogenicity in innate and adaptive immune cells.

49

We and others have previously shown immunomodulatory effects of DCA and other CDK8 inhibitors (18, 22-25). We used two different approaches to validate CDK8 as the T<sub>reg</sub>-relevant mechanistic target of DCA. Firstly, we tested DCA alongside a structurally distinct small molecule CDK8 inhibitor, BRD-6989 (22). In T<sub>reg</sub><sup>low</sup> conditions, both CDK8 inhibitors showed concentration-dependent enhancement of murine T<sub>reg</sub> differentiation with EC<sub>50</sub> for each compound similar to that observed for enhancing IL-10 production in BMDCs (Fig. 2B) (22). The EC<sub>50</sub> of DCA was much lower than of BRD-6989, driving its subsequent preferential use (Fig. 2B). Notably, DCA and BRD-6989 both exhibited low cytotoxicity, even less than that observed with harmine, which we previously identified as one of the least cytotoxic T<sub>reg</sub> enhancers (Fig. 2B) (7). Secondly, we used CRISPR/Cas9 to knock out *CDK8* in primary human CD4<sup>+</sup> T cells. Efficient editing of CDK8 led to enhanced T<sub>reg</sub> differentiation comparable to levels observed using DCA treatment (Fig. 1E and 2C). These results indicate that DCA enhances murine and human T<sub>reg</sub> differentiation at least in part by inhibiting CDK8.

## **DCA-driven T<sub>regs</sub> are fully tolerogenic in the absence of DCA-innate immune tolerogenic effects**

We next interrogated the suppressive capacity of DCA-driven T<sub>reg</sub> cells both in vitro and in vivo. Using a standard in vitro suppression assay, we observed no significant differences in the ability of T<sub>reg</sub><sup>hi</sup>- or T<sub>reg</sub><sup>low+DCA</sup>-driven murine T<sub>reg</sub> cells to suppress proliferation of co-cultured responder CD4<sup>+</sup> T cells (Fig. 3A, red and blue lines respectively). We tested the capacity of DCA-driven T<sub>regs</sub> to inhibit inflammation in vivo in two murine T<sub>reg</sub>-transfer models in order to exclude confounding effects of systemically-delivered DCA on endogenous innate immune cells. In an established model of type 1 diabetes, transfer of NOD-*BDC2.5*<sup>+</sup> CD4<sup>+</sup> T cells, specific for an epitope derived from the islet antigen chromogranin A, into NOD-*scid* recipients results in islet β-cell destruction and onset of diabetes about 10 days later (Fig. 3B, black line) (34, 35). Co-



75 injection of antigen-specific T<sub>reg</sub> cells, generated from naïve NOD-*BDC2.5.Foxp3<sup>IREG-GFP</sup>* CD4<sup>+</sup> T  
76 cells using either T<sub>reg</sub><sup>low+DCA</sup> or T<sub>reg</sub><sup>hi</sup> conditions, significantly delayed onset of diabetes to a  
77 similar degree (Fig. 3B, blue and red lines respectively) (7). We observed similar results in a  
78 murine model of intestinal inflammation where transfer of CD45RB<sup>hi</sup>CD4<sup>+</sup> T cells into  
79 B10.RAG2<sup>-/-</sup> recipients results in expansion of donor T cells and inflammation most prominent in  
80 the colon about 4 weeks later (Fig. 3C, black) (36, 37). Co-transfer of T<sub>reg</sub> cells, generated from  
81 naïve wild-type C57Bl/6 CD4<sup>+</sup> T cells using either T<sub>reg</sub><sup>low+DCA</sup> or T<sub>reg</sub><sup>hi</sup> conditions, resulted in  
82 significant and similar attenuation of intestinal inflammation (Fig. 3C, blue and red respectively)  
83 (38). Together, these results demonstrate that DCA-driven T<sub>reg</sub> cells are fully functional and  
84 equivalent to T<sub>reg</sub><sup>hi</sup>-generated T<sub>reg</sub> cells (an adoptive cellular therapy-relevant gold standard  
85 comparison) both in vitro and in vivo, using model systems employing different genetic  
86 backgrounds and T cell specificities. Importantly, these experiments demonstrate that DCA exerts  
87 a strong T<sub>reg</sub>-intrinsic tolerogenic effect in the absence of concomitant effects on the innate  
88 immune compartment.

## 90 **DCA exerts tolerogenic effects on T cell differentiation independent of regulating** 91 **STAT1<sup>Ser727</sup>, STAT3<sup>Ser727</sup> and c-Jun<sup>Ser243</sup> phosphorylation**

92 We investigated key candidates that might account for DCA's tolerogenic effects in CD4<sup>+</sup>  
93 T cells. CDK8 phosphorylates STAT1<sup>Ser727</sup> and STAT3<sup>Ser727</sup> in several cell types (39-42).  
94 Although the role of Ser727 phosphorylation in Th1/Th17/T<sub>reg</sub> differentiation is unclear, potential  
95 contribution is suggested by the central role of STAT1<sup>Tyr701</sup> and STAT3<sup>Tyr705</sup> tyrosine  
96 phosphorylation in Th1 and Th17 differentiation respectively (43-45). Recent studies argue that  
97 inhibition of CDK8 promotes Th17 differentiation by attenuating STAT3<sup>Ser727</sup> phosphorylation,  
98 emphasizing the importance of investigating this pathway (26). DCA reduced IL-6-induced  
99 STAT3<sup>Ser727</sup> phosphorylation in murine CD4<sup>+</sup> T cells, but did not reduce either STAT3<sup>Tyr705</sup>

phosphorylation or expression of the hallmark Th17 transcription factor ROR $\gamma$ t in cells cultured in Th17<sup>hi</sup> conditions; total STAT3 was slightly decreased (Fig. 4A-C). Primary CD4<sup>+</sup> T cells from *Stat3<sup>Ser727Ala</sup>* mice, in which Ser727Ala mutation abrogates STAT3<sup>Ser727</sup> phosphorylation, showed reduced Th17 differentiation, highlighting a previously unappreciated role of STAT3<sup>Ser727</sup> phosphorylation in this process (Fig. 4D) (40). However, DCA suppressed Th17 and enhanced T<sub>reg</sub> differentiation in both *Stat3<sup>Ser727Ala</sup>* and wild-type CD4<sup>+</sup> T cells, demonstrating that DCA regulates T<sub>reg</sub> and Th17 differentiation via mechanisms independent of STAT3<sup>Ser727</sup> phosphorylation (Fig. 4D-E).

We also showed that DCA reduced IFN $\gamma$ -induced phospho-STAT1<sup>Ser727</sup> but not of phospho-STAT1<sup>Tyr701</sup> or total STAT1 in cells cultured in Th1<sup>hi</sup> conditions (Fig. 4F-G). Expression of the hallmark Th1 transcription factor Tbet in Th1<sup>hi</sup> cultures was also unaltered by DCA except at day 4, arguing against altered regulation by STAT1<sup>Ser727</sup> (Fig. 4H). Primary CD4<sup>+</sup> T cells from *Stat1<sup>Ser727Ala</sup>* mice, in which Ser727Ala mutation abrogates STAT1<sup>Ser727</sup> phosphorylation, showed reduced Th1 differentiation, highlighting a previously unappreciated role of STAT1<sup>Ser727</sup> phosphorylation in this process (Fig. 4I) (41). However, DCA suppressed Th1 and enhanced T<sub>reg</sub> differentiation in both *Stat1<sup>Ser727Ala</sup>* and wild-type CD4<sup>+</sup> T cells, demonstrating that DCA regulates T<sub>reg</sub> and Th1 differentiation via mechanisms independent of STAT1<sup>Ser727</sup> phosphorylation (Fig. 4I-J).

Consistent with previously published findings, we also found that treatment with DCA inhibited IL-2-induced phosphorylation of STAT5b<sup>Ser730</sup> (Fig. S2A) (18). We were unable to find *Stat5b<sup>Ser730Ala</sup>* mice to perform similar studies as with STAT1 and STAT3 above.

We next investigated the overlap between characterized CDK8-regulated pathways in innate and adaptive immune cells. Similar to our findings in myeloid cells, T cells cultured in either  $T_{reg}^{low}$  or  $T_{reg}^{hi}$  conditions showed increased phosphorylation of both c-Jun<sup>Ser243</sup> and c-Jun<sup>Ser63</sup>; DCA specifically inhibited phosphorylation on the inhibitory site c-Jun<sup>Ser243</sup> (Fig. S2B) (22). Unlike in myeloid cells, DCA's tolerogenic pro- $T_{reg}$  effect in T cells was neither attenuated by the AP-1 inhibitor T-5224 nor enhanced by overexpression of multiple c-Jun family members (c-Jun, JunB or JunD) (Fig. S2C-D). Together, these results indicate that DCA regulation of AP-1 transcription factors drives tolerogenicity in myeloid, but not CD4<sup>+</sup> T, cells.

### **DCA enhances Foxp3 expression by engaging GATA3**

Temporal flow cytometric analysis of FOXP3 expression throughout the period of culture revealed indistinguishable kinetics between murine CD4<sup>+</sup> T cells cultured in  $T_{reg}^{low}$  and  $T_{reg}^{hi}$  conditions until day 2, with FOXP3<sup>+</sup> cells increasing in  $T_{reg}^{hi}$  conditions and decreasing in  $T_{reg}^{low}$  conditions thereafter (Fig. 5A) (7). Notably, DCA treatment significantly increased FOXP3<sup>+</sup> cells, as well as *Foxp3* expression, at early time points (days 1 and 2) compared to either  $T_{reg}^{low}$  or  $T_{reg}^{hi}$  conditions (Fig. 5A-B). DCA treatment also drove concordant regulation of other FOXP3-regulated genes at day 2, including upregulation of *Eos*, *Helios* and *Cd25* as well as downregulation of *Il2* expression (Fig. 5B) (46-49). These data suggest that DCA promotes murine  $T_{reg}$  differentiation at least in part by enhancing early expression of FOXP3. This induction of key  $T_{reg}$  transcription factors did not involve canonical  $T_{reg}$  pathways; specifically, DCA neither enhanced SMAD2/SMAD3 nor inhibited (mTOR pathway members) S6/S6K phosphorylation, pointing to the involvement of novel pathway(s) (Fig. S3A-B).

DCA's unusual chemical immunophenotype led us to consider a mechanistic link between DCA-mediated enhancement of both  $T_{reg}$  and Th2 differentiation. GATA3, the hallmark Th2

transcription factor, is highly expressed beginning at the earliest timepoints of Th2 differentiation (50). Although not well studied in the context of T<sub>reg</sub> differentiation, previous findings that GATA3 binds the CNS2 enhancer element of the *FOXP3* locus and regulates mature T<sub>reg</sub> physiology support the possibility that GATA3 could regulate *FOXP3* expression and thus T<sub>reg</sub> differentiation (51-53). Consistent with this notion, DCA treatment of both murine and human CD4<sup>+</sup> T cells cultured in T<sub>reg</sub><sup>low</sup> conditions also enhanced early *GATA3* expression at day 2 (Fig. 5C). To validate the role of DCA-mediated upregulation of GATA3 in T<sub>reg</sub> differentiation, we generated lentiviral vectors to overexpress *GATA3*, including a truncated NGFR marker separated by a self-splicing T2A peptide to allow specific comparison of transduced cells. We performed these experiments using human T cells because these were more amenable to viral transduction. Overexpression of *GATA3* consistently enhanced T<sub>reg</sub> differentiation in human naïve CD4<sup>+</sup> T cells cultured in T<sub>reg</sub><sup>low</sup> conditions, compared to cells transduced with control (NGFR only) virus (Fig. 5D). To further support the functional significance of DCA-enhanced GATA3, we performed chromatin immunoprecipitation experiments and found that DCA treatment of human CD4<sup>+</sup> T cells cultured in T<sub>reg</sub><sup>low</sup> conditions resulted in significantly increased binding of GATA3 specifically to *FOXP3* CNS2 early in T<sub>reg</sub> differentiation (Fig. 5E). These results argue that GATA3 is an early regulator of *FOXP3* expression and T<sub>reg</sub> differentiation that can be regulated by DCA.

We sought to better understand how DCA might regulate *GATA3* expression. Previous studies showed that Notch can directly drive *Gata3* expression and that enhanced Notch signaling promotes T<sub>reg</sub> differentiation (54, 55). Furthermore, CDK8 inhibits Notch signaling by phosphorylating the Notch signaling domain ICD1, leading to its degradation, leading us to hypothesize that DCA may drive *Gata3* expression by enhancing Notch signaling in T cells (19). Consistent with this notion, we found that treatment with DCA led to increased intranuclear levels

of ICD1 in both murine and human CD4<sup>+</sup> T cells (Fig. 5F). Supporting functional relevance of DCA-driven increased intracellular ICD1, we performed RNAseq analyses comparing FOXP3<sup>+</sup> cells cultured for 2 days in T<sub>reg</sub><sup>low</sup> versus T<sub>reg</sub><sup>low+DCA</sup> conditions to define a 577-gene signature associated with DCA treatment. Using a previously described method, we showed that this signature is maintained in sorted mature FOXP3<sup>+</sup> iT<sub>reg</sub>s generated after 4 days of culture in T<sub>reg</sub><sup>low+DCA</sup> versus T<sub>reg</sub><sup>hi</sup> conditions and partially maintained in FOXP3<sup>+</sup> versus FOXP3<sup>-</sup> cells cultured for 2 days in T<sub>reg</sub><sup>low</sup> conditions, supporting FOXP3- and T<sub>reg</sub>-relevance of this signature (Fig S4) (7, 56). Transcription factor target analysis of this DCA signature using the ChIP-seq result-based Gene Transcription Regulation Database (GTRD) in GSEA revealed MAML as the most enriched transcription factor (Table S1) (57-59). MAML is recruited by DNA-bound ICD1, in complex with RBP-J, whereupon it recruits transcriptional co-activators (60). Therefore, enrichment of MAML binding sites is consistent with enrichment of ICD1 binding to DCA-regulated genes. Together, these results demonstrate for the first time that inhibition of CDK8 by DCA drives *FOXP3* expression and T<sub>reg</sub> differentiation at least in part by driving increased Notch and GATA3 signaling.

## 90 Discussion

91 Here we have demonstrated that DCA promotes T<sub>reg</sub> differentiation at least in part by  
 92 engaging a previously unappreciated CDK8-GATA3-FOXP3 pathway. Our use of both novel  
 93 small molecules (DCA and BRD-6989) and CRISPR/Cas9-mediated deletion point to CDK8  
 94 inhibition as the mechanism by which DCA exerts these effects. While previous studies have  
 95 shown that GATA3 impacts mature T<sub>reg</sub> physiology, this is the first report to our knowledge that  
 96 GATA3 can drive T<sub>reg</sub> differentiation (51, 61). Our findings extend prior studies showing that  
 97 GATA3 protein levels are upregulated during T<sub>reg</sub> differentiation (62). Whether GATA3 initiates,  
 98 stabilizes or amplifies *FOXP3* expression remains to be dissected in future studies. Previous  
 99 reports suggesting that GATA3 inhibits FOXP3 expression used significantly different  
 100 experimental approaches, including secondary CD3 stimulation or removal of primary TCR  
 101 stimulation, and did not exclude contribution of IL-4 (63, 64). Given that GATA3 is a hallmark  
 102 Th2 transcription factor that inhibits Th1 and likely Th17 differentiation, this CDK8-GATA3-  
 103 FOXP3 pathway provides a parsimonious unifying mechanism to explain, at least in part, how  
 104 DCA broadly regulates T<sub>reg</sub>, Th2, Th1 and Th17 differentiation (65-67). Given that Th2 cells can  
 105 produce IL-10, this previously unappreciated link between T<sub>reg</sub> and Th2 differentiation may point  
 106 to conserved (e.g. CDK8-related) anti-inflammatory signaling pathways that can engage distinct  
 107 downstream effector pathways (68). We hypothesize that differences in the local cytokine milieu  
 108 impact whether DCA enhances T<sub>reg</sub> or Th2 differentiation, for example by modulating epigenetic  
 109 accessibility of *FOXP3* and *IL4* loci. Additionally, where CDK8 effector pathways regulating  
 110 tolerogenicity in innate (via phospho-c-Jun<sup>Ser243</sup>) vs adaptive immune cells diverge remains to be  
 111 clearly defined (22).

12

13 Our discovery of DCA's unusual temporal profile of enhancing early expression FOXP3  
 14 and many FOXP3-regulated genes contrasts with the temporal profile of T<sub>reg</sub><sup>hi</sup> conditions and

other T<sub>reg</sub>-enhancing compounds like harmine and reinforces a model of T<sub>reg</sub> differentiation that involves independently regulated early and late pathways (7). Whereas early pathways might involve TGFβ licensing cells to adopt T<sub>reg</sub> fate and express FOXP3, late pathways might maintain and promote T<sub>reg</sub> lineage commitment. Our data support a model where DCA largely enhances early pathways, including Notch-GATA3, to regulate FOXP3 expression. This suggests DCA may have particular therapeutic relevance to patients who have defects in early pathways of T<sub>reg</sub> differentiation and also raises the possibility of synergy with therapies that enhance late pathways of T<sub>reg</sub> differentiation.

Our findings exemplify how chemical immunotypes point to an important classification scheme that can inform both mechanistic and therapeutic hypotheses. DCA's unique chemical immunophenotype (pro-T<sub>reg</sub>, pro-Th2 and pro-myeloid-IL-10) is distinct from that of many other tolerogenic compounds, including SIK- and DYRK1A-inhibitors, which exert tolerogenic effects specifically in either innate or adaptive immune cells, but not both (7, 22). Our novel finding that CDK8 inhibition promotes both T<sub>reg</sub> and Th2 differentiation directly informed our interrogation of GATA3 as a putative regulator of T<sub>reg</sub> differentiation. Additionally, our studies suggest value in monitoring tolerogenic effects, including impaired host-versus-tumor effects, in anticipated clinical use of CDK8 inhibitors as cancer therapeutics (69, 70).

The translational relevance of these data is reinforced by our finding that DCA promotes T<sub>reg</sub> differentiation in primary human CD4<sup>+</sup> T cells. We note that T<sub>regs</sub> generated using DCA are fully functional in vitro and in vivo. Importantly, our use of T<sub>reg</sub>-transfer models specifically interrogates the functionality of DCA-driven T<sub>regs</sub> without confounding anti-inflammatory effects on innate immune cells, that could confound the interpretation of models using systemic drug administration (18, 25). DCA and other CDK8 inhibitors may find utility as tolerogenic

immunomodulators. Studies suggesting poor long-term tolerability of CDK8 inhibitors, together with our data showing DCA impacts early pathways in T<sub>reg</sub> differentiation, support this consideration (71). We recognize the utility of DCA in generating T<sub>reg</sub>s ex vivo, which would circumvent concerns regarding toxicity in vivo (71).

Our findings highlight the value of definitive interrogation of regulatory pathways. Prior knowledge drove the notion of CDK8-STAT interactions as key candidates to explain how CDK8 inhibition regulates T cell differentiation (14). Our experiments using *Stat1*<sup>Ser727Ala</sup> and *Stat3*<sup>Ser727Ala</sup> mice clearly demonstrate that DCA regulates Th1, Th17 and T<sub>reg</sub> differentiation independent of its effects on STAT1<sup>Ser727</sup>/STAT3<sup>Ser727</sup> phosphorylation. Prior studies suggest that STAT1<sup>Ser727</sup>/STAT3<sup>Ser727</sup> phosphorylation is required for full transcriptional activity (39-42). Consistent with this, we demonstrate a previously unappreciated role of STAT1<sup>Ser727</sup> and STAT3<sup>Ser727</sup> phosphorylation in positively regulating Th1 and Th17 differentiation respectively. These findings differ from recent studies suggesting that CDK8 inhibition promotes human Th17 differentiation; possible explanations include differences in species, CDK8 inhibitor and experimental approach (knockin versus transduced allele) (26). This emphasizes the value of Ser-Ala STAT mutant mice in dissecting (CDK8-related) mechanistic hypotheses, including developing *Stat5b*<sup>Ser730Ala</sup> mice to definitively define the role of CDK8-regulated STAT5b<sup>Ser730</sup> phosphorylation in T<sub>reg</sub> differentiation (18). These findings have important implications for disease pathobiology and precision therapy, for example suggesting synergy of therapeutically targeting STAT1<sup>Tyr701</sup>/STAT3<sup>Tyr705</sup>, STAT1<sup>Ser727</sup>/STAT3<sup>Ser727</sup> and CDK8.

In summary, our studies highlight CDK8 as a regulator of innate and adaptive immune tolerogenicity that is therapeutically targeted by the high-specificity low-toxicity inhibitor DCA (9). We show for the first time that CDK8 regulates Th2 differentiation, and human T<sub>reg</sub>



55 differentiation. The unique chemical immunophenotype of DCA (pro-T<sub>reg</sub>/Th2) directly informs  
 56 the discovery of a novel CDK8-Notch-GATA3-FOXP3 axis that regulates early pathways of T<sub>reg</sub>  
 57 differentiation and has further mechanistic and therapeutic implications. Our demonstration that  
 58 DCA effectively enhances T<sub>reg</sub> differentiation compared to canonical T<sub>reg</sub> enhancers suggests  
 59 utility in approaches to generate T<sub>regs</sub> ex vivo for adoptive cellular therapy. In addition, the  
 70 broadly tolerogenic effects of DCA suggest that it may broadly be useful in the setting of  
 71 pathologic inflammation or autoimmunity.

## 72 **Materials and Methods**

### 73 **Mice**

74 Balb/c RRID:IMSR\_JAX:000651, C57Bl/6 000664RRID:IMSR\_JAX:000664, *Foxp3*<sup>IREG-GFP</sup>  
 75 RRID:IMSR\_JAX:006772, *CD45.1*<sup>+/+</sup>002014RRID:IMSR\_JAX:002014, NOD-*scid* and NOD-  
 76 *BDC2.5* mice were purchased from Jackson Labs. NOD-*BDC2.5.Foxp3*<sup>IREG-GFP</sup> mice were from  
 77 the JDRF Transgenic Core (Harvard Medical School, Boston, MA). C57Bl/10-*Rag2*<sup>-/-</sup> mice were  
 78 a kind gift from Brian Kelsall (37). *Stat1*<sup>Ser727Ala</sup> and *Stat3*<sup>Ser727Ala</sup> mice were previously described  
 79 (40, 41). Mice were housed in the Benaroya Research Institute Vivarium in a SPF animal room  
 80 with unfettered access to food and water. All murine experiments were performed on male and  
 81 female mice between 7-12 weeks of age, with the approval of the IACUC of Benaroya Research  
 82 Institute (Seattle, WA).

### 84 **Human samples**

85 Frozen PBMCs and fresh peripheral blood samples were obtained from the Benaroya Research  
 86 Institute Immune Mediated Disease Registry and Repository. Human studies were approved by  
 87 the Benaroya Research Institute's Institutional Review Board and all subjects signed written  
 88 informed consent prior to inclusion in the study.

### 90 **Cell lines**

91 293T cells used in lentiviral production were a generous gift from David Rawlings. 293T cells are  
 92 female. They were cultured DMEM medium (Hyclone) supplemented with fetal bovine serum  
 93 and glutamax (Thermo fisher) at 37°C and 5% CO<sub>2</sub>. Cells were split every 3 days at a density of  
 94 7.5x10<sup>4</sup> cells per ml.

### 96 **Small Molecules and Reagents**

Δ16-cortistatin A (DCA) was a generous gift from P. Baran (The Scripps Research Institute) and synthesized as previously reported (20, 72). Small-molecule reagents were confirmed to have ≥95% purity by HPLC–MS. Antibodies, chemical reagents and cytokines were sourced as listed in Table S2. Primers are listed in Table S3

## Cloning and Plasmid Preparation

Coding sequences of GATA3, JUND, c-JUN and JUNB were PCR amplified from pHAGE-GATA3, JunD-HA neo, pMIEG3-c-Jun and pMIEG3-JunB (Addgene #116747, 58515, 40348 and 40349, gifts from Gordon Mills & Kenneth Scott, Kevin Janes, and Alexander Dent respectively). PCR overhang extension was used to add (i) self-splicing T2A sequence and (ii) 40 base pair homology arms (HA) to permit cloning into into EcoRV-digested pLKO.NGFR using Gibson assembly ultra-kit (Codex DNA, San Diego, CA). Primers used are listed in Table S2.

## Murine T cell isolation and culture

Unless otherwise noted, CD4<sup>+</sup> CD62L<sup>+</sup> naïve T cells were isolated from 8-12 week-old mice using CD4 negative enrichment kits (Stemcell Technologies, Vancouver, Canada) and CD62L microbeads (Miltenyi Biotec, San Diego, CA) according to the manufacturer's instructions and confirmed >90% pure by flow cytometry. Cells were cultured on 96 well plates pre-coated with anti-CD3 and anti-CD28 using conditions outlined in Table S4. The addition of DCA to T<sub>reg</sub><sup>low</sup> conditions is abbreviated as T<sub>reg</sub><sup>low+DCA</sup>. T<sub>reg</sub> and Th1 cultures were fed with equal volume of IL-2 supplemented media (20ng/ml) and retreated with compound at day 2, split 1:2 into IL-2-supplemented media (10 ng/ml) at day 3 and analyzed at day 4. Th17 cultures were treated similarly except no IL-2 was supplemented. Th2 cultures were treated similarly as T<sub>reg</sub> cultures except they were additionally split 1:2 into IL-2 supplemented media (10 ng/ml) at day 4 and day 5 and analyzed on day 6. To assess STAT1/STAT3/STAT5b Ser phosphorylation, cells were

stimulated with 10 ng/ml IFN $\gamma$  + 2 $\mu$ g/ml anti-IL-4, 10 ng/ml IL-6 + 2  $\mu$ g/ml each anti-IL4/-12/-  
IFN $\gamma$  and anti-CD3/CD28 + 100 ng/ml IL-2 respectively.

24

## 25 **Human T cell isolation and culture**

26 Frozen PBMCs and fresh peripheral blood samples were obtained from the Benaroya Research  
27 Institute Immune Mediated Disease Registry and Repository. Human peripheral blood  
28 mononuclear cells were isolated from fresh whole blood by Ficoll-Paque (GE Healthcare, Little  
29 Chalfont, United Kingdom). CD4<sup>+</sup>CD45RA<sup>+</sup> naïve T cells were isolated using negative  
30 enrichment kits (Stemcell Technologies, Vancouver, Canada) per manufacturer's instructions and  
31 confirmed >90% pure by flow cytometry. Cells were cultured on 96 well plates pre-coated with  
32 anti-CD3 and anti-CD28 using conditions outlined in Table S4. T<sub>reg</sub> cultures were fed with equal  
33 volume of IL-2 supplemented media (20ng/ml) and retreated with compound at day 2, split 1:2  
34 into IL-2-supplemented media (10 ng/ml) at day 4 and analyzed at day 5. Th2 cultures were fed  
35 and split into media supplemented with IL-2+IL-4 (20 ng/ml each at day 2, 10 ng/ml each  
36 thereafter) and compound as indicated to maintain ~10<sup>6</sup> cells/ml, restimulated on days 7 and 14  
37 on plates pre-coated with anti-CD3 and anti-CD28 and analyzed at day 21 as previously described  
38 (73).

39

## 40 **Lentiviral Production**

41 On day 0, 3.8 x 10<sup>6</sup> 293T cells were plated in 10 ml DMEM + 5% Glutamax (Thermofisher) on a  
42 10 cm plate. On day 1, cells were transfected with 1.5  $\mu$ g pMD2G, 3  $\mu$ g psPAX2 (kind gifts from  
43 David Rawlings) and 6  $\mu$ g of pLKO vector, mixed with 42  $\mu$ g PEI transfection reagent  
44 (Polysciences, Inc.) and suspended in 0.5 ml diluent (10 mM HEPES, 150mM NaCl, pH 7.05).  
45 Cells were PBS-washed and fed with fresh DMEM + Glutamax on day 2. Viral supernatant was  
46 harvested on day 4, centrifuged (2000 rpm x 5 mins) to remove cellular debris, overlaid onto 5 ml

of 10% sucrose in NTE (135 mM NaCl, 10mM TrisCl, pH 7.50, 1mM EDTA) in ultra-centrifuge tubes (Beckman) and centrifuged at 25,000 rpm for 90 minutes at 4°C. Supernatant was removed and viral pellet resuspended in ice cold NTE by shaking for 2 hours at 4°C.

50

## 51 **RNP complexing**

RNPs were generated by mixing 1.25 ug Cas9 protein (Aldevron, Fargo, ND) and 2.5 pmol each of 3 sgRNAs (Synthego, Menlo Park, CA) with gentle swirling, and incubating at 37°C for 15 minutes. Guides used were CDK8: CUCAUGCUGAUAGGAAG, UGUUUCUGUCUCAUGCUGAU, and UCUGUCUCAUGCUGAUAGGA.

56

## 57 **CRISPR-Cas9 gene editing**

CRISPR-Cas9 gene editing was performed as previously described with modifications (Aksoy et al., 2020; Roth et al., 2018). Briefly, human CD4<sup>+</sup>CD45RA<sup>+</sup> naïve T cells were cultured on 96 well plates pre-coated with anti-CD3 and anti-CD28 in TCM supplemented with 5% Fetal Bovine Serum, 20 ng/ml IL-2 and 2 µg/ml each of anti-IL-12, anti-IFNγ and anti-IL-4. Cells were harvested 2 days later, centrifuged (90 g for 8 minutes), resuspended in buffer T, mixed with 20µM of each RNP complex and electroporated (1600 volts, 10 ms, 3 pulses) using a Neon transfection system (Thermo Fisher, Waltham, MA). Cells were transferred into 90 µl TCM pre-warmed to 37°C. After 24 hours, cells were fed with media supplemented with 100 ng/ml IL-2 and 1 ng/ml TGFβ. Cells were maintained for 5 additional days at a density of 1x10<sup>6</sup>/ml and then analyzed by flow cytometry.

58

## 59 **Flow Cytometry**

Cells were stimulated with PMA and ionomycin (50 and 500ng/ml respectively) (Sigma Aldrich, St. Louis, MO) in the presence of Golgistop (BD Biosciences, San Jose, CA) 5 hours prior to

analysis as necessary. Cells were typically stained with LIVE/DEAD (Thermo Fisher, Waltham, MA) and anti-CD4 prior to fixation and permeabilization, which was generally performed with either Foxp3 fixation/permeabilization buffers (eBioscience, San Diego, CA). Phosflow cell lyse/fix and PermIII buffers (BD Biosciences, San Jose, CA) were used for phospho-protein assessment. Intracellular staining was performed per manufacturer's instructions. Counting beads (10  $\mu$ m, Spherotech, Lake Forest, IL) were added at 5000 per sample. Acquisition was performed on either a FACScalibur or a FACScanto (BD Biosciences, San Jose, CA). Cell sorting was performed using a FACs Aria II (BD Biosciences, San Jose, CA). Data was analyzed using FlowJo software (Treestar, Ashland, OR). Fractional maximal enhancement was determined by increase in percentage lineage-committed cells, relative to maximal cytokine-driven enhancement as previously reported (7). Fractional inhibition was calculated relative to DMSO treated cells (7). STAT1/STAT3 phosphorylation was quantified as previously described (74).

84

#### 85 **In vitro proliferation and T<sub>reg</sub> suppression assay**

86 These were performed as previously described (75). Briefly, sorted CD45.1<sup>+</sup>CD4<sup>+</sup>CD62L<sup>+</sup>  
87 T<sub>responders</sub> were labeled with CellTrace Far Red (Thermo Fisher, Waltham, MA) per manufacturer's  
88 protocol and plated at 5x10<sup>4</sup> cells per well in 96-well U-bottom plates in the presence of anti-CD3  
89 anti-CD28 beads (Dynabead, Grand Island, NY). For T<sub>reg</sub> suppression assays, T<sub>responders</sub> were co-  
90 cultured with sorted CD45.2<sup>+</sup>Foxp3<sup>IRES-GFP<sup>+</sup></sup> T<sub>reg</sub> cells generated as indicated. Cells were analyzed  
91 by flow cytometry 3 days later.

92

#### 93 **T<sub>reg</sub> suppression – Type 1 diabetes model**

94 These were performed as previously described (7). Briefly, 5x10<sup>4</sup> sorted CD4<sup>+</sup>CD62L<sup>+</sup> naïve T  
95 cells isolated from NOD-BDC2.5<sup>+</sup> mice were injected intravenously into NOD-*scid* mice with or  
96 without 1x10<sup>5</sup> T<sub>reg</sub> cells generated from NOD-BDC2.5<sup>+</sup>FOXP3<sup>IRES-GFP</sup> mice as indicated (34, 35).

97 Blood glucose levels were monitored with a handheld Contour glucometer (Bayer, Leverkusen,  
98 Germany) at days 3, 6, 8 and every day following. Diabetes was diagnosed when blood sugar  
99 exceeded 250 mg/dl for 2 consecutive days.

100

## 101 **T<sub>reg</sub> suppression – CD45RB<sup>hi</sup> colitis model**

102 As previously described 5x10<sup>5</sup> sorted CD4<sup>+</sup>CD62L<sup>+</sup> naïve T cells isolated from CD45.1<sup>+</sup> mice  
103 were injected intravenously into B10-*Rag2*<sup>-/-</sup> mice (37, 38). 5 days later, mice were injected with  
104 either PBS or 1.5x10<sup>5</sup> T<sub>reg</sub> cells generated from Foxp3<sup>IRE5-GFP</sup> mice as indicated (38). Mice were  
105 monitored at least weekly for weight loss and morbidity per protocol. Mice were euthanized after  
106 4 weeks and proximal, medial, and distal colon analyzed histologically by blinded observers as  
107 previously described (76).

108

## 109 **Histology**

110 Tissues were preserved in 10% formalin. Paraffin embedding, sectioning and staining with  
111 hematoxylin and eosin was performed by the Histology Core (Benaroya Research Institute,  
112 Seattle, WA).

113

## 114 **Western Blotting**

115 Cells were washed in PBS and lysed in either TNN lysis buffer, pH 8 (100 mM TRIS-HCl, 100  
116 mM NaCl, 1% NP-40, 1 mM DTT, 10 mM NaF) or RIPA lysis buffer (150 mM NaCl, 1% Triton  
117 X-100, 0.5% sodium deoxycholate, 0.1% SDS, 50 mM TRIS-HCl at pH7.8) supplemented with  
118 DTT, protease inhibitors (Roche, Indianapolis, IN) and phosphatase inhibitors (Cell Signaling  
119 Technologies, Danvers, MA). Lysates were separated by SDS-PAGE using Tris-Glycine gels  
120 loaded with about 1x10<sup>6</sup> cell equivalents per well and transferred onto PDVF membrane  
121 (Millipore, Burlington, MA). Blots were blocked in either 5% Milk (Nestle, Vervy, Switzerland)

or bovine serum albumin (Sigma Aldrich, St. Louis, MO) and visualized with Western Lightning Plus-ECL (Perkin Elmer, Waltham, MA) and/or SuperSignal West Femto substrate (Thermo Scientific, Waltham, MA) per manufacturer's instructions. Nuclear isolation was performed using Nuclei EZ Prep kit per manufacturer's instructions (Sigma Aldrich, St. Louis, MO). Fractions were subsequently lysed with Triton X-100 lysis buffer (1% Triton X-100, 150 mM NaCl, 50 mM Tris-HCl pH7.8). Band intensity was quantified by ImageJ (77).

## RNA Isolation and qRT-PCR

RNA was isolated using RNeasy kits (Qiagen, Valencia, CA) and cDNA generated using iScript cDNA synthesis kits (BioRad, Hercules, CA) per manufacturer's directions. Real-time PCR was performed using an ABI 7500 FAST REAL-TIME PCR (Applied Biosystems, Foster City, CA) system. Cycling conditions were as follows; 1 cycle of 50°C for 2 minutes, 95°C for 10 minutes, followed by 40 cycles of 95°C for 15 seconds, and 60°C for 1 minute. Primers used are listed in Table S3.

## RNA-seq library preparation and sequencing

RNA-seq libraries were generated from four *Foxp3*<sup>GFP</sup> littermate mice. On day 0, 1000 naïve CD4<sup>+</sup>CD62L<sup>+</sup> cells were sorted for RNA-seq. The remaining cells were cultured on plates pre-coated with anti-CD3 and anti-CD28 in T<sub>reg</sub><sup>low</sup>, T<sub>reg</sub><sup>hi</sup> and T<sub>reg</sub><sup>low+DCA</sup> conditions. On day 2, 250 FOXP3<sup>+</sup> cells and 500 FOXP3<sup>-</sup> cells were sorted from cells cultured in T<sub>reg</sub><sup>low</sup>, T<sub>reg</sub><sup>hi</sup> and T<sub>reg</sub><sup>low+DCA</sup> conditions. On day 4, 1000 FOXP3<sup>+</sup> cells were sorted from T<sub>reg</sub><sup>hi</sup> and T<sub>reg</sub><sup>low+DCA</sup> cultures. Cells were sorted directly into lysis buffer from the SMART-Seq v4 Ultra Low Input RNA Kit for Sequencing (Takara) and frozen until all samples were ready for simultaneous processing. Reverse transcription was performed followed by PCR amplification to generate full length amplified cDNA. Sequencing libraries were constructed using the NexteraXT DNA sample



preparation kit (Illumina) to generate Illumina-compatible barcoded libraries. Libraries were pooled and quantified using a Qubit® Fluorometer (Life Technologies). Dual-index, single-read sequencing of pooled libraries was carried out on a HiSeq2500 sequencer (Illumina) with 58-base reads, using HiSeq v4 Cluster and SBS kits (Illumina) with a target depth of 5 million reads per sample.

Base-calling was performed automatically by Illumina real time analysis software. Demultiplexing to generate FASTQ files was performed by bcl2fastq running on the Illumina BaseSpace platform. Subsequent processing was performed using the Galaxy platform. FASTQ reads were trimmed in two steps: 1) hard-trimming to remove 1 3'-end base (FASTQ Trimmer tool, v.1.0.0); 2) quality trimming from both ends until minimum base quality for each read  $\geq 30$  (FastqMcf, v.1.1.2). Reads were aligned to the GRCm38 mouse reference genome using STAR v.2.4.2a, with gene annotations from GRCm38 Ensembl release number 91 (78). Read counts per Ensembl gene ID were quantified using htseq-count v.0.4.1 (79). Sequencing, alignment, and quantitation metrics were obtained for FASTQ, BAM/SAM, and count files in Galaxy using FastQC v0.11.3, Picard v1.128, Samtools v1.2, and htseq-count v.0.4.1 (80). RNAseq data were then processed using Tidyverse, Biomart, EdgeR and limma to generate relative expression values (81-84). The raw RNA-seq data has been deposited to the Gene Expression Omnibus (GEO) with accession number GSE141933.

## Pathway Analysis

Pathway analysis was performed using the Gene Set Enrichment Analysis Molecular Signature Database or MSigDB v7.0 which uses the hypergeometric distribution on a background of all genes to calculate a p-value (58, 85, 86).

## 72 **Microscale Chromatin Immunoprecipitation Assay**

73 Assay was performed as described previously with few modifications (87). 100,000 naïve CD4<sup>+</sup>  
74 T-cells were cultured in T<sub>reg</sub><sup>low</sup> and T<sub>reg</sub><sup>low+DCA</sup> conditions for 2 days and then harvested, washed  
75 with ice cold PBS, fixed using 10% v/v of 11% formaldehyde (diluted from 36% stock in 50mM  
76 HEPES pH 7.5, 100 mM NaCl, 1 mM EDTA, 0.5 mM EGTA) for 10 minutes, quenched using 5%  
77 v/v 2.5 M glycine for 5 minutes, washed twice with 1ml ice-cold PBS and lysed in 50 µl lysis  
78 buffer (50mM Tris-HCL pH 8.0, 10 mM EDTA, 1%SDS, 20mg/ml sodium butyrate)  
79 supplemented with phenyl methane sulfonyl fluoride and protease inhibitor cocktail (Active  
80 Motif, Carlsbad, CA). DNA was sheared by sonication (Biorupter, Diagenode, Denville, NJ) into  
81 200-500 bp fragments. Chromatin was pre-cleared using 30 µl protein G agarose beads (Active  
82 Motif) pre-blocked with BSA per manufacturer's instructions; beads were then removed by  
83 centrifugation. Chromatin was diluted with equal volume PBS, 4 µl of anti-GATA3 or isotype  
84 control (Cell Signaling Technologies, Danvers, MA) added and sample incubated at 4°C with end  
85 over end rotation. Next, 30 µl of pre-blocked Protein G Agarose beads was added and sample  
86 incubated for 4 hours at 4°C. Beads were then sequentially washed with 1 ml each low SDS lysis  
87 buffer (50mM Tris-HCL pH 8.0, 10 mM EDTA, 0.1%SDS, 20mg/ml sodium butyrate), low salt  
88 buffer (10 mM Tris-HCl, pH 8, 1 mM EDTA, 50 mM NaCl), high salt buffer (50 mM Tris-HCl,  
89 pH 8, 500 mM NaCl, 0.1% SDS, 0.5% Na-deoxycholate, 1% Nonidet-P40 and 1 mM EDTA) and  
90 LiCl Buffer (50 mM Tris-HCl, pH 8, 250 mM LiCl, 1 mM EDTA, 1% Nonidet-P40 and 0.5% Na-  
91 deoxycholate) and 1 ml TE (10 mM Tris-HCl, pH 8, 1 mM EDTA). Beads were transferred to  
92 fresh tubes, centrifuged and chromatin was eluted by incubating in 100 µl elution buffer (50 mM  
93 Tris-HCl, pH 8, 10 mM EDTA and 1% SDS) at 65°C with agitation. Chromatin was transferred  
94 to fresh tubes and incubated with 2 µl RNase A (Qiagen, 20 mg/ml) and 6 µl 5M NaCL (Active  
95 Motif) for 30 minutes at 37°C followed by 2 µl proteinase K (Active Motif, 0.2 mg/ml) at 65°C  
96 for 2 hours. DNA was then purified by phenol/chloroform extraction and resuspended in nuclease

free water. Quantitative PCR was performed as described above. Primer sequences used were;  
 FOXP3 CNS2, Forward: 5'-GGACATCACCTACCACATCC-3' Reverse: 5'-  
 ACCACGGAGGAAGAGAAGAG-3';  $\beta$ -Actin, Forward: 5'-TCCCCTCCTTTTGCGAAAA-3'  
 Reverse: 5'-CTCCCTCCTCCTCTTCCTCAA -3'

01

## 02 **Statistical analyses**

Statistical measures, including mean values, standard deviations, Student's t-tests, Mantel–Cox  
 tests, Mann–Whitney tests and one-way ANOVA tests, were performed using Graphpad Prism  
 software and R. Definitions of n = values are stated in each figure legend. Where appropriate,  
 unless otherwise stated, graphs display mean  $\pm$  standard deviation.

07

## 08    **References and Notes**

09

- 10    1.    E. Zigmond *et al.*, Ly6C hi monocytes in the inflamed colon give rise to proinflammatory  
11       effector cells and migratory antigen-presenting cells. *Immunity*. **37**, 1076–1090 (2012).
- 12    2.    E. Zigmond, S. Jung, Intestinal macrophages: well educated exceptions from the rule.  
13       *Trends Immunol.* **34**, 162–168 (2013).
- 14    3.    S. Z. Josefowicz, L.-F. Lu, A. Y. Rudensky, Regulatory T cells: mechanisms of  
15       differentiation and function. *Annu. Rev. Immunol.* **30**, 531–564 (2012).
- 16    4.    E. Cretney, A. Kallies, S. L. Nutt, Differentiation and function of Foxp3(+) effector  
17       regulatory T cells. *Trends Immunol.* **34**, 74–80 (2013).
- 18    5.    J. J. O'shea, W. E. Paul, Mechanisms Underlying Lineage Commitment and Plasticity of  
19       Helper CD4+ T Cells. *Science*. **327**, 1098–1102 (2010).
- 20    6.    E. Batlle, J. Massagué, Transforming Growth Factor- $\beta$  Signaling in Immunity and Cancer.  
21       *Immunity*. **50**, 924–940 (2019).
- 22    7.    B. Khor *et al.*, The kinase DYRK1A reciprocally regulates the differentiation of Th17 and  
23       regulatory T cells. *Elife*. **4** (2015), doi:10.7554/eLife.05920.
- 24    8.    T. B. Sundberg *et al.*, Small-molecule screening identifies inhibition of salt-inducible  
25       kinases as a therapeutic strategy to enhance immunoregulatory functions of dendritic cells.  
26       *Proc Natl Acad Sci USA* (2014), doi:10.1073/pnas.1412308111.
- 27    9.    M. Chen *et al.*, Systemic Toxicity Reported for CDK8/19 Inhibitors CCT251921 and  
28       MSC2530818 Is Not Due to Target Inhibition. *Cells*. **8**, 1413 (2019).
- 29    10.    R. C. Conaway, J. W. Conaway, Function and regulation of the Mediator complex. *Curr*  
30       *Opin Genet Dev.* **21**, 225–230 (2011).
- 31    11.    S. Sato *et al.*, A set of consensus mammalian mediator subunits identified by  
32       multidimensional protein identification technology. *Mol Cell*. **14**, 685–691 (2004).

- 33 12. M. Malumbres, Cyclin-dependent kinases. *Genome Biol.* **15**, 122 (2014).
- 34 13. M. D. Galbraith *et al.*, CDK8 Kinase Activity Promotes Glycolysis. *CellReports.* **21**, 1495–  
35 1506 (2017).
- 36 14. J. Bancerek *et al.*, CDK8 kinase phosphorylates transcription factor STAT1 to selectively  
37 regulate the interferon response. *Immunity.* **38**, 250–262 (2013).
- 38 15. A. Lin *et al.*, Casein kinase II is a negative regulator of c-Jun DNA binding and AP-1  
39 activity. *Cell.* **70**, 777–789 (1992).
- 40 16. C.-C. Huang *et al.*, Calcineurin-mediated dephosphorylation of c-Jun Ser-243 is required  
41 for c-Jun protein stability and cell transformation. *Oncogene.* **27**, 2422–2429 (2008).
- 42 17. N. Taira *et al.*, DYRK2 priming phosphorylation of c-Jun and c-Myc modulates cell cycle  
43 progression in human cancer cells. *J Clin Invest.* **122**, 859–872 (2012).
- 44 18. M. Akamatsu *et al.*, Conversion of antigen-specific effector/memory T cells into Foxp3-  
45 expressing Treg cells by inhibition of CDK8/19. *Sci Immunol.* **4**, eaaw2707 (2019).
- 46 19. C. J. Fryer, J. B. White, K. A. Jones, Mastermind recruits CycC:CDK8 to phosphorylate  
47 the Notch ICD and coordinate activation with turnover. *Mol Cell.* **16**, 509–520 (2004).
- 48 20. J. Shi *et al.*, Scalable synthesis of cortistatin A and related structures. *J Am Chem Soc.* **133**,  
49 8014–8027 (2011).
- 50 21. H. E. Pelish *et al.*, Mediator kinase inhibition further activates super-enhancer-associated  
51 genes in AML. *Nature.* **526**, 273–276 (2015).
- 52 22. L. Johannessen *et al.*, Small-molecule studies identify CDK8 as a regulator of IL-10 in  
53 myeloid cells. *Nat. Chem. Biol.* **13**, 1102–1108 (2017).
- 54 23. A. Witalisz-Siepracka *et al.*, NK Cell-Specific CDK8 Deletion Enhances Antitumor  
55 Responses. *Cancer Immunol Res.* **6**, 458–466 (2018).
- 56 24. E. M. Putz *et al.*, CDK8-mediated STAT1-S727 phosphorylation restrains NK cell  
57 cytotoxicity and tumor surveillance. *CellReports.* **4**, 437–444 (2013).

- 58 25. Z. Guo, G. Wang, Y. Lv, Y. Y. Wan, J. Zheng, Inhibition of Cdk8/Cdk19 Activity  
59 Promotes Treg Cell Differentiation and Suppresses Autoimmune Diseases. *Front Immunol.*  
60 **10**, 775–10 (2019).
- 61 26. J. Martinez-Fabregas *et al.*, CDK8 Fine-Tunes IL-6 Transcriptional Activities by Limiting  
62 STAT3 Resident Time at the Gene Loci. *CellReports*. **33**, 108545 (2020).
- 63 27. J. L. Coombes *et al.*, A functionally specialized population of mucosal CD103+ DCs  
64 induces Foxp3+ regulatory T cells via a TGF-beta and retinoic acid-dependent mechanism.  
65 *J Exp Med*. **204**, 1757–1764 (2007).
- 66 28. D. Mucida *et al.*, Reciprocal TH17 and regulatory T cell differentiation mediated by  
67 retinoic acid. *Science*. **317**, 256–260 (2007).
- 68 29. C. M. Sun *et al.*, Small intestine lamina propria dendritic cells promote de novo generation  
69 of Foxp3 T reg cells via retinoic acid. *J Exp Med*. **204**, 1775–1785 (2007).
- 70 30. S. Haxhinasto, D. Mathis, C. Benoist, The AKT-mTOR axis regulates de novo  
71 differentiation of CD4+Foxp3+ cells. *J Exp Med*. **205**, 565–574 (2008).
- 72 31. J. A. Hill *et al.*, Retinoic acid enhances Foxp3 induction indirectly by relieving inhibition  
73 from CD4+CD44hi Cells. *Immunity*. **29**, 758–770 (2008).
- 74 32. S. Sauer *et al.*, T cell receptor signaling controls Foxp3 expression via PI3K, Akt, and  
75 mTOR. *Proc Natl Acad Sci USA*. **105**, 7797–7802 (2008).
- 76 33. J. A. Hall *et al.*, Essential role for retinoic acid in the promotion of CD4(+) T cell effector  
77 responses via retinoic acid receptor alpha. *Immunity*. **34**, 435–447 (2011).
- 78 34. A. E. Herman, G. J. Freeman, D. Mathis, C. Benoist, CD4+CD25+ T regulatory cells  
79 dependent on ICOS promote regulation of effector cells in the prediabetic lesion. *J Exp*  
80 *Med*. **199**, 1479–1489 (2004).

35. K. V. Tarbell, S. Yamazaki, K. Olson, P. Toy, R. M. Steinman, CD25+ CD4+ T cells, expanded with dendritic cells presenting a single autoantigenic peptide, suppress autoimmune diabetes. *J Exp Med.* **199**, 1467–1477 (2004).
36. F. Powrie, M. W. Leach, S. Mauze, L. B. Caddle, R. L. Coffman, Phenotypically distinct subsets of CD4+ T cells induce or protect from chronic intestinal inflammation in C. B-17 scid mice. *Int Immunol.* **5**, 1461–1471 (1993).
37. V. Valatas *et al.*, Host-dependent control of early regulatory and effector T-cell differentiation underlies the genetic susceptibility of RAG2-deficient mouse strains to transfer colitis. *Mucosal immunology.* **6**, 601–611 (2013).
38. P. M. Smith *et al.*, The microbial metabolites, short-chain fatty acids, regulate colonic Treg cell homeostasis. *Science.* **341**, 569–573 (2013).
39. P. Kovarik *et al.*, Specificity of signaling by STAT1 depends on SH2 and C-terminal domains that regulate Ser727 phosphorylation, differentially affecting specific target gene expression. *EMBO J.* **20**, 91–100 (2001).
40. Y. Shen *et al.*, Essential role of STAT3 in postnatal survival and growth revealed by mice lacking STAT3 serine 727 phosphorylation. *Mol Cell Biol.* **24**, 407–419 (2004).
41. L. Varinou *et al.*, Phosphorylation of the Stat1 transactivation domain is required for full-fledged IFN-gamma-dependent innate immunity. *Immunity.* **19**, 793–802 (2003).
42. Z. Wen, Z. Zhong, J. E. Darnell, Maximal activation of transcription by Stat1 and Stat3 requires both tyrosine and serine phosphorylation. *Cell.* **82**, 241–250 (1995).
43. M. Afkarian *et al.*, T-bet is a STAT1-induced regulator of IL-12R expression in naïve CD4+ T cells. *Nature Publishing Group.* **3**, 549–557 (2002).
44. A. A. Lighvani *et al.*, T-bet is rapidly induced by interferon-gamma in lymphoid and myeloid cells. *Proc Natl Acad Sci USA.* **98**, 15137–15142 (2001).

- 05 45. X. O. Yang *et al.*, STAT3 regulates cytokine-mediated generation of inflammatory helper  
06 T cells. *J Biol Chem.* **282**, 9358–9363 (2007).
- 07 46. Y. Zheng *et al.*, Genome-wide analysis of Foxp3 target genes in developing and mature  
08 regulatory T cells. *Nature.* **445**, 936–940 (2007).
- 09 47. A. Marson *et al.*, Foxp3 occupancy and regulation of key target genes during T-cell  
10 stimulation. *Nature.* **445**, 931–935 (2007).
- 11 48. W. Fu *et al.*, A multiply redundant genetic switch “locks in” the transcriptional signature of  
12 regulatory T cells. *Nat Immunol.* **13**, 972–980 (2012).
- 13 49. S. Hori, T. Nomura, S. Sakaguchi, Control of regulatory T cell development by the  
14 transcription factor Foxp3. *Science.* **299**, 1057–1061 (2003).
- 15 50. W. Zheng, R. A. Flavell, The transcription factor GATA-3 is necessary and sufficient for  
16 Th2 cytokine gene expression in CD4 T cells. *Cell.* **89**, 587–596 (1997).
- 17 51. E. A. Wohlfert *et al.*, GATA3 controls Foxp3<sup>+</sup> regulatory T cell fate during inflammation  
18 in mice. *J Clin Invest.* **121**, 4503–4515 (2011).
- 19 52. G. Wei *et al.*, Genome-wide analyses of transcription factor GATA3-mediated gene  
20 regulation in distinct T cell types. *Immunity.* **35**, 299–311 (2011).
- 21 53. D. Rudra *et al.*, Transcription factor Foxp3 and its protein partners form a complex  
22 regulatory network. *Nat Immunol.* **13**, 1010–1019 (2012).
- 23 54. T. C. Fang *et al.*, Notch directly regulates Gata3 expression during T helper 2 cell  
24 differentiation. *Immunity.* **27**, 100–110 (2007).
- 25 55. C. Mota *et al.*, Delta-like 1-mediated Notch signaling enhances the in vitro conversion of  
26 human memory CD4 T cells into FOXP3-expressing regulatory T cells. *The Journal of*  
27 *Immunology.* **193**, 5854–5862 (2014).
- 28 56. N. Joller *et al.*, Treg Cells Expressing the Coinhibitory Molecule TIGIT Selectively Inhibit  
29 Proinflammatory Th1 and Th17 Cell Responses. *Immunity.* **40**, 569–581 (2014).



- 30 57. I. Yevshin, R. Sharipov, S. Kolmykov, Y. Kondrakhin, F. Kolpakov, GTRD: a database on  
31 gene transcription regulation-2019 update. *Nucleic Acids Res.* **47**, D100–D105 (2019).
- 32 58. A. Subramanian *et al.*, Gene set enrichment analysis: a knowledge-based approach for  
33 interpreting genome-wide expression profiles. *Proc Natl Acad Sci USA.* **102**, 15545–15550  
34 (2005).
- 35 59. V. K. Mootha *et al.*, PGC-1alpha-responsive genes involved in oxidative phosphorylation  
36 are coordinately downregulated in human diabetes. *Nat Genet.* **34**, 267–273 (2003).
- 37 60. M. Kitagawa, Notch signalling in the nucleus: roles of Mastermind-like (MAML)  
38 transcriptional coactivators. *J Biochem.* **159**, 287–294 (2016).
- 39 61. Y. Wang, M. A. Su, Y. Y. Wan, An essential role of the transcription factor GATA-3 for  
40 the function of regulatory T cells. *Immunity.* **35**, 337–348 (2011).
- 41 62. P.-Y. Mantel *et al.*, GATA3-driven Th2 responses inhibit TGF-beta1-induced FOXP3  
42 expression and the formation of regulatory T cells. *PLoS Biol.* **5**, e329 (2007).
- 43 63. J. Wei *et al.*, Antagonistic nature of T helper 1/2 developmental programs in opposing  
44 peripheral induction of Foxp3+ regulatory T cells. *Proc Natl Acad Sci USA.* **104**, 18169–  
45 18174 (2007).
- 46 64. S. Hadjur *et al.*, IL4 blockade of inducible regulatory T cell differentiation: the role of Th2  
47 cells, Gata3 and PU.1. *Immunol. Lett.* **122**, 37–43 (2009).
- 48 65. W. Ouyang *et al.*, Inhibition of Th1 development mediated by GATA-3 through an IL-4-  
49 independent mechanism. *Immunity.* **9**, 745–755 (1998).
- 50 66. R. Yagi *et al.*, The Transcription Factor GATA3 Actively Represses RUNX3 Protein-  
51 Regulated Production of Interferon- $\gamma$ . *Immunity.* **32**, 507–517 (2010).
- 52 67. J. P. van Hamburg *et al.*, Enforced expression of GATA3 allows differentiation of IL-17-  
53 producing cells, but constrains Th17-mediated pathology. *Eur J Immunol.* **38**, 2573–2586  
54 (2008).

- 55 68. D. F. Fiorentino, M. W. Bond, T. R. Mosmann, Two types of mouse T helper cell. IV. Th2  
56 clones secrete a factor that inhibits cytokine production by Th1 clones. *J Exp Med.* **170**,  
57 2081–2095 (1989).
- 58 69. I. Menzl, A. Witalisz-Siepracka, V. Sexl, CDK8-Novel Therapeutic Opportunities.  
59 *Pharmaceuticals.* **12**, 92–12 (2019).
- 60 70. R. Firestein *et al.*, CDK8 is a colorectal cancer oncogene that regulates beta-catenin  
61 activity. *Nature.* **455**, 547–551 (2008).
- 62 71. P. A. Clarke *et al.*, Assessing the mechanism and therapeutic potential of modulators of the  
63 human Mediator complex-associated protein kinases. *Elife.* **5** (2016),  
64 doi:10.7554/eLife.20722.
- 65 72. J. Shi *et al.*, Stereodivergent synthesis of 17-alpha and 17-beta-apharyl steroids:  
66 application and biological evaluation of D-ring cortistatin analogues. *Angew. Chem. Int.*  
67 *Ed. Engl.* **48**, 4328–4331 (2009).
- 68 73. D. J. Cousins, T. H. Lee, D. Z. Staynov, Cytokine Coexpression During Human Th1/Th2  
69 Cell Differentiation: Direct Evidence for Coordinated Expression of Th2 Cytokines. *J*  
70 *Immunol.* **169**, 2498–2506 (2002).
- 71 74. A. Chaudhry *et al.*, Interleukin-10 signaling in regulatory T cells is required for  
72 suppression of Th17 cell-mediated inflammation. *Immunity.* **34**, 566–578 (2011).
- 73 75. L. W. Collison, D. A. A. Vignali, In vitro Treg suppression assays. *Methods Mol Biol.* **707**,  
74 21–37 (2011).
- 75 76. Y. P. De Jong *et al.*, Chronic murine colitis is dependent on the CD154/CD40 pathway and  
76 can be attenuated by anti-CD154 administration. *Gastroenterology.* **119**, 715–723 (2000).
- 77 77. C. A. Schneider, W. S. Rasband, K. W. Eliceiri, NIH Image to ImageJ: 25 years of image  
78 analysis. *Nat Methods.* **9**, 671–675 (2012).

78. A. Dobin *et al.*, STAR: ultrafast universal RNA-seq aligner. *Bioinformatics*. **29**, 15–21  
(2013).

79. S. Anders, P. T. Pyl, W. Huber, HTSeq--a Python framework to work with high-throughput  
sequencing data. *Bioinformatics*. **31**, 166–169 (2015).

80. H. Li *et al.*, The Sequence Alignment/Map format and SAMtools. *Bioinformatics*. **25**,  
2078–2079 (2009).

81. H. Wickham *et al.*, Welcome to the Tidyverse. *JOSS*. **4**, 1686–6 (2019).

82. S. Durinck *et al.*, BioMart and Bioconductor: a powerful link between biological databases  
and microarray data analysis. *Bioinformatics*. **21**, 3439–3440 (2005).

83. D. J. McCarthy, Y. Chen, G. K. Smyth, Differential expression analysis of multifactor  
RNA-Seq experiments with respect to biological variation. *Nucleic Acids Res.* **40**, 4288–  
4297 (2012).

84. M. E. Ritchie *et al.*, limma powers differential expression analyses for RNA-sequencing  
and microarray studies. **43**, e47 (2015).

85. A. Liberzon *et al.*, The Molecular Signatures Database (MSigDB) hallmark gene set  
collection. *Cell Systems*. **1**, 417–425 (2015).

86. X. Xie *et al.*, Systematic discovery of regulatory motifs in human promoters and 3' UTRs  
by comparison of several mammals. *Nature*. **434**, 338–345 (2005).

87. G. Seumois *et al.*, Epigenomic analysis of primary human T cells reveals enhancers  
associated with TH2 memory cell differentiation and asthma susceptibility. *Nat Immunol.*  
**15**, 777–788 (2014).

## 03 **Figure legends**

04 **Fig. 1. DCA broadly regulates differentiation of murine and human T cells.** (A-C) Effect of  
 05 DCA on murine naïve CD4<sup>+</sup> T cells cultured in (A) suboptimal pro-T<sub>reg</sub> or -Th2 conditions (T<sub>reg</sub><sup>low</sup>  
 06 and Th2<sup>low</sup> respectively), (B) near-optimal pro-Th1 or -Th17 conditions (Th1<sup>hi</sup> and Th17<sup>hi</sup>  
 07 respectively) or (C) neutral Th0 conditions (n = 4-12, x4 experiments). (D-E) Effect of DCA, all-  
 08 trans retinoic acid (ATRA) and rapamycin (RAPA) on number (D) and percent (E) of T<sub>reg</sub>S  
 09 generated from murine (n = 9, x4 experiments) and human (n = 7-8, x3 experiments) naïve CD4<sup>+</sup>  
 10 T cells cultured in T<sub>reg</sub><sup>low</sup> conditions. (F) Effect of DCA on human naïve CD4<sup>+</sup> T cells cultured in  
 11 Th2<sup>low</sup> conditions (n = 5, x2 experiments). Mann-Whitney (A-B), Kruskal-Wallis (C-E) and  
 12 paired t-test (F) results, \*P<0.05, \*\* P<0.01, \*\*\* P<0.001 \*\*\*\*P<0.0001.

14 **Fig. 2. DCA describes a unique chemical immunophenotype.** (A) Dose-response curves  
 15 showing effect of DCA, harmine and HG-9-91-01 on murine CD4<sup>+</sup> T cells cultured in suboptimal  
 16 T<sub>reg</sub><sup>low</sup>, Th2<sup>low</sup>, Th1<sup>low</sup> and Th17<sup>low</sup> conditions (n = 3-5, x3-5 experiments). Fractional maximal  
 17 enhancement was determined by increase in percentage lineage-committed cells, relative to  
 18 maximal cytokine-driven enhancement as previously reported (7). (B) Naive murine CD4<sup>+</sup> T cell  
 19 cultures showing dose-response of the CDK8 inhibitors DCA and BRD-6989 on T<sub>reg</sub>  
 20 differentiation (left) and culture cellularity (right) (n = 2, x2 experiments). Harmine (HAR) is  
 21 included for comparison. (C) Effect of CRISPR/Cas9-mediated deletion of CDK8, compared to  
 22 mock (no guide) control, on propensity of human CD4<sup>+</sup> T cells to differentiate into T<sub>reg</sub>S (left) and  
 23 CDK8 expression (right). (n = 4, x2 experiments). Paired t-test (C), \* P<0.05, \*\* P<0.01.

25 **Fig. 3. DCA enhances differentiation of functional T<sub>reg</sub>S.** Suppressive function of DCA-driven  
 26 T<sub>reg</sub>S (T<sub>reg</sub><sup>low+DCA</sup>, blue), compared to T<sub>reg</sub><sup>hi</sup>-driven T<sub>reg</sub>S (red). (A) Standard in vitro suppression  
 27 assay, (B) NOD.BDC2.5 model of type 1 diabetes and (C) B10.Rag2<sup>-/-</sup> model of colitis. No-T<sub>reg</sub>

controls shown in black. All data representative of at least 2 independent experiments ( $n \geq 4$  mice per cohort). Mantel-Cox (B) and Mann-Whitney (C) results, \*  $P < 0.05$ , \*\*  $P < 0.01$ , \*\*\*  $P < 0.001$ .

#### Fig. 4. DCA regulates T cell differentiation independently of STAT1/STAT3 Ser727

**phosphorylation.** (A) Effect of DCA on IL-6-induced STAT3<sup>Ser727</sup> phosphorylation in resting murine CD4<sup>+</sup> T cells (representative of 2 independent experiments). (B-C) Effect of DCA on phospho-STAT3<sup>Tyr705</sup> and total STAT3 (B,  $n = 2$ , x2 experiments) and ROR $\gamma$ t (C,  $n = 3$ , x3 experiments) in murine CD4<sup>+</sup> T cells cultured in Th17<sup>hi</sup> conditions. (D-E) Effect of DCA on Th17 (D) and T<sub>reg</sub> (E) differentiation in STAT3<sup>Ser727Ala</sup> naïve murine CD4<sup>+</sup> T cells. ( $n = 8$ , x3 experiments). (F) Effect of DCA on IFN $\gamma$ -induced STAT1<sup>Ser727</sup> phosphorylation in resting murine CD4<sup>+</sup> T cells (representative of 2 independent experiments). (G-H) Effect of DCA on phospho-STAT1<sup>Tyr705</sup> and total STAT1 (G,  $n = 2$ , x2 experiments) and T-bet (H,  $n = 3$ , x3 experiments) in murine CD4<sup>+</sup> T cells cultured in Th1<sup>hi</sup> conditions. (I-J) Effect of DCA on Th1 (I) and T<sub>reg</sub> (J) differentiation in STAT1<sup>Ser727Ala</sup> naïve murine CD4<sup>+</sup> T cells ( $n = 4$ , x2 experiments). Mann-Whitney \*  $P < 0.05$ , \*\*  $P < 0.01$ , \*\*\*  $P < 0.001$ .

#### Fig. 5. DCA drives novel early FOXP3 expression via a novel CDK8-Notch-GATA3

**pathway.** (A) Timecourse of FOXP3 expression in murine CD4<sup>+</sup> T cells cultured in T<sub>reg</sub><sup>low</sup>, T<sub>reg</sub><sup>low+DCA</sup> and T<sub>reg</sub><sup>hi</sup> conditions ( $n = 10$ , x5 experiments). (B) Effect of DCA on expression of FOXP3-regulated genes in murine CD4<sup>+</sup> T cells cultured for 2 days in T<sub>reg</sub><sup>low</sup> conditions ( $n = 9$ , x3 experiments). (C) Effect of DCA on *Gata3* expression in murine ( $n = 3$ , x3 experiments) and human ( $n = 9$ , x3 experiments) CD4<sup>+</sup> T cells, cultured for 2 days in T<sub>reg</sub><sup>low</sup> conditions. (D) Effect of overexpressing GATA3, using transduction of either NGFR-T2A-GATA3 or NGFR control lentivirus, on T<sub>reg</sub> differentiation in human CD4<sup>+</sup> T cells cultured in T<sub>reg</sub><sup>low</sup> conditions ( $n = 12$ , x3 experiments). (E) ChIP-qPCR quantitation of how DCA treatment impacts GATA3 binding to

53 FOXP3 CNS2 in human CD4<sup>+</sup> T cells, cultured for 2 days in T<sub>reg</sub><sup>low</sup> conditions (n = 3, x3  
 54 experiments).  $\beta$ -actin is included as a control locus. (F) Effect of DCA on intranuclear levels of  
 55 Notch intracellular domain (ICD), normalized to nuclear Lamin B1 levels, in murine and human  
 56 CD4<sup>+</sup> T cells stimulated for 2 hours in indicated conditions (representative of  $\geq 2$  independent  
 57 experiments). Mann-Whitney (B), Wilcoxon matched pair analysis (C-D) and paired t-test (E), \*  
 58 P<0.05, \*\* P<0.01, \*\*\* P<0.001 \*\*\*\*P<0.0001.

59

## 60 **Acknowledgments**

61 **General:** We would like to express our deep appreciation to Anne Hocking, Karen Cerosaletti,  
 62 Jessica Hamerman and Daniel Campbell for helpful discussion. B10.Rag2<sup>-/-</sup> mice were a kind gift  
 63 from Dr. Brian Kelsall. We would like to acknowledge Tina Polintan for editorial assistance.

64

65 **Funding:** BK was supported by N.I.H. grant K08 DK104021.

66

67 **Author contributions:** BK, AA, RJX, PSL, VHJ and TBS designed studies. AA, KGM, KJF,  
 68 TBS, LJ, AFS and BK conducted experiments. AA, KJF, YZ and BK analyzed data. NSG, TD,  
 69 YZ, DEL, IJM and ZSR provided reagents. AA and BK wrote the manuscript.

70

71 **Competing interests:** The authors have no conflicts of interest to disclose.

72

73 **Data and materials availability:** RNAseq libraries generated in this study have been made  
 74 available at the Gene Expression Omnibus (GEO) accession number: GSE141933

75

## Figures and Tables

**Fig. 1.**

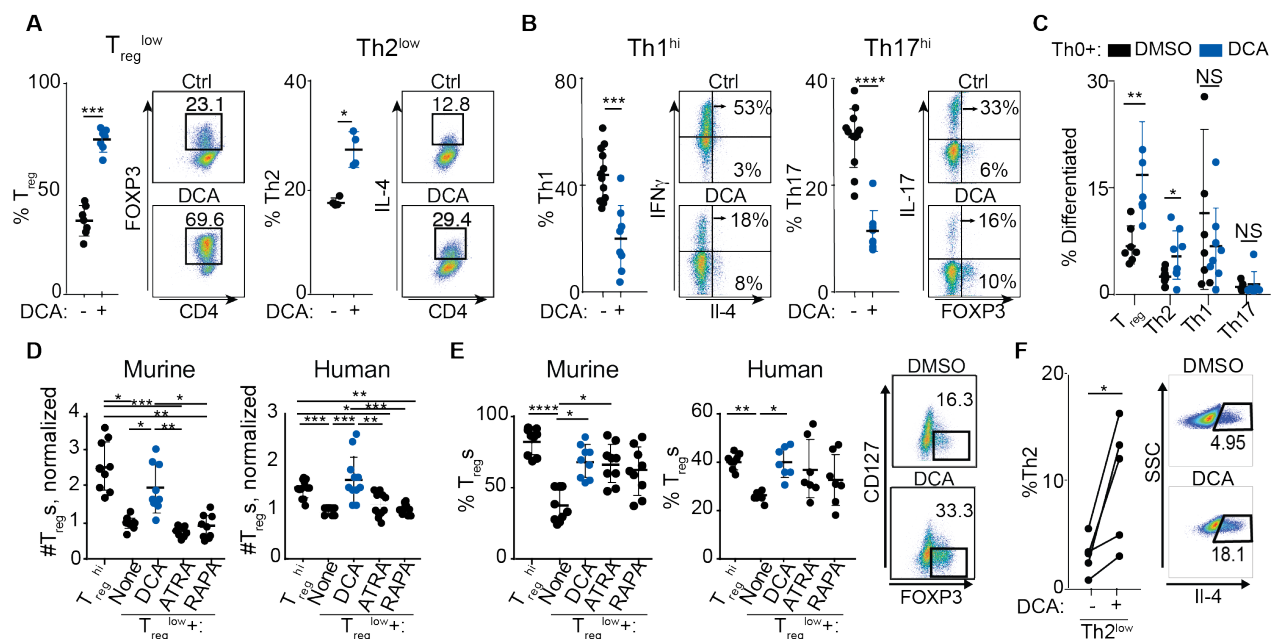

**DCA broadly regulates differentiation of murine and human T cells.** (A-C) Effect of DCA on

murine naïve  $CD4^{+}$  T cells cultured in (A) suboptimal pro- $T_{reg}$  or - $Th2$  conditions ( $T_{reg}^{low}$  and

$Th2^{low}$  respectively), (B) near-optimal pro- $Th1$  or - $Th17$  conditions ( $Th1^{hi}$  and  $Th17^{hi}$

respectively) or (C) neutral  $Th0$  conditions (n = 4-12, x4 experiments). (D-E) Effect of DCA, all-

trans retinoic acid (ATRA) and rapamycin (RAPA) on number (D) and percent (E) of  $T_{reg}$ s

generated from murine (n = 9, x4 experiments) and human (n = 7-8, x3 experiments) naïve  $CD4^{+}$

T cells cultured in  $T_{reg}^{low}$  conditions. (F) Effect of DCA on human naïve  $CD4^{+}$  T cells cultured in

$Th2^{low}$  conditions (n = 5, x2 experiments). Mann-Whitney (A-B), Kruskal-Wallis (C-E) and

paired t-test (F) results, \* $P<0.05$ , \*\*  $P<0.01$ , \*\*\*  $P<0.001$  \*\*\*\* $P<0.0001$ .

# Fig. 2.

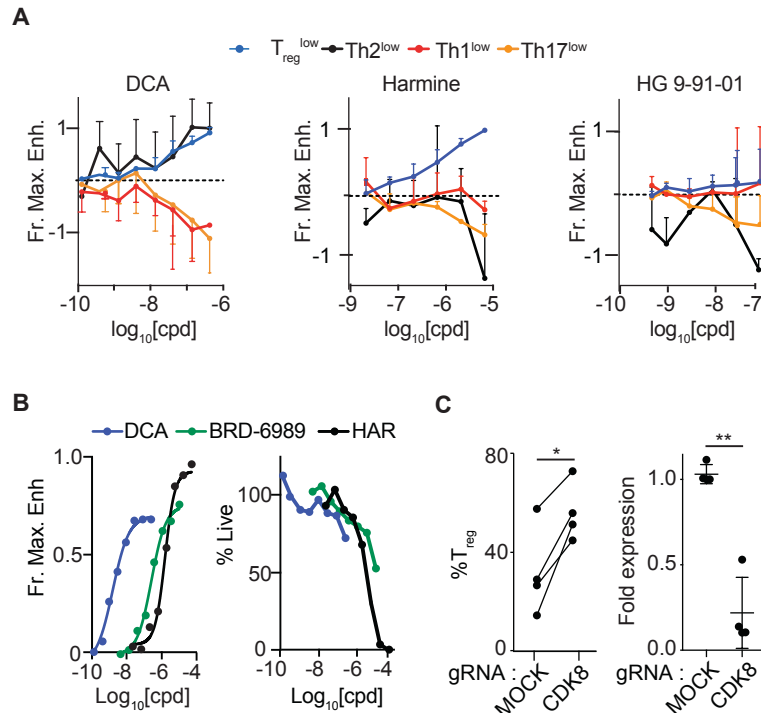

94  
95

96 **DCA describes a unique chemical immunophenotype.** (A) Dose-response curves showing  
97 effect of DCA, harmine and HG-9-91-01 on murine CD4<sup>+</sup> T cells cultured in suboptimal T<sub>reg</sub><sup>low</sup>,  
98 Th2<sup>low</sup>, Th1<sup>low</sup> and Th17<sup>low</sup> conditions (n = 3-5, x3-5 experiments). Fractional maximal  
99 enhancement was determined by increase in percentage lineage-committed cells, relative to  
100 maximal cytokine-driven enhancement as previously reported (7). (B) Naive murine CD4<sup>+</sup> T cell  
101 cultures showing dose-response of the CDK8 inhibitors DCA and BRD-6989 on T<sub>reg</sub>  
102 differentiation (left) and culture cellularity (right) (n = 2, x2 experiments). Harmine (HAR) is  
103 included for comparison. (C) Effect of CRISPR/Cas9-mediated deletion of CDK8, compared to  
104 mock (no guide) control, on propensity of human CD4<sup>+</sup> T cells to differentiate into T<sub>reg</sub>s (left) and  
105 CDK8 expression (right). (n = 4, x2 experiments). Paired t-test (C), \* P<0.05, \*\* P<0.01.

96



Fig. 3.

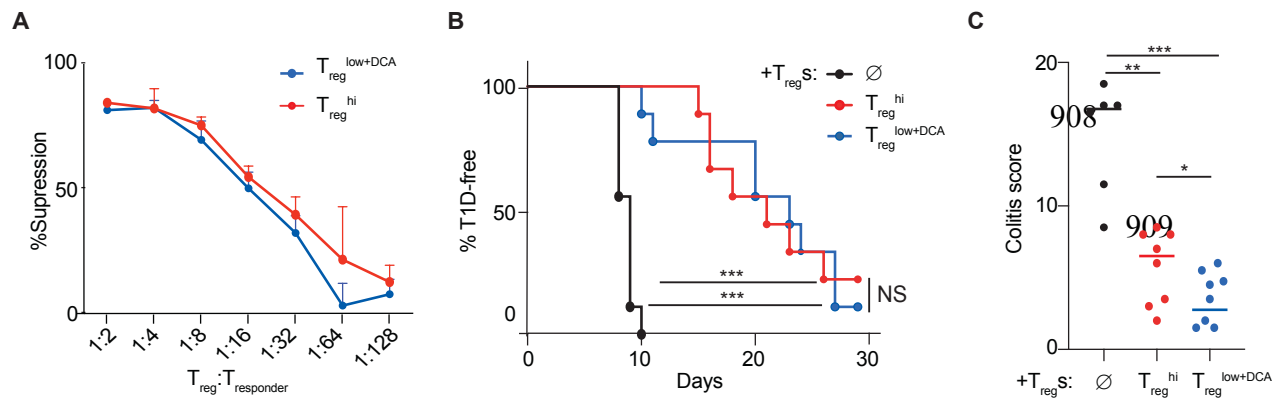

10

11

12 **DCA enhances differentiation of functional Tregs.** Suppressive function of DCA-driven Tregs

13 (T<sub>reg</sub><sup>low+DCA</sup>, blue), compared to T<sub>reg</sub><sup>hi</sup>-driven Tregs (red). (A) Standard in vitro suppression assay,

14 (B) NOD.BDC2.5 model of type 1 diabetes and (C) B10.Rag2<sup>-/-</sup> model of colitis. No-T<sub>reg</sub> controls

15 shown in black. All data representative of at least 2 independent experiments (n≥4 mice per

16 cohort). Mantel-Cox (B) and Mann-Whitney (C) results, \* P<0.05, \*\* P<0.011, \*\*\* P<0.001.

17

18

19 **Fig. 4.**

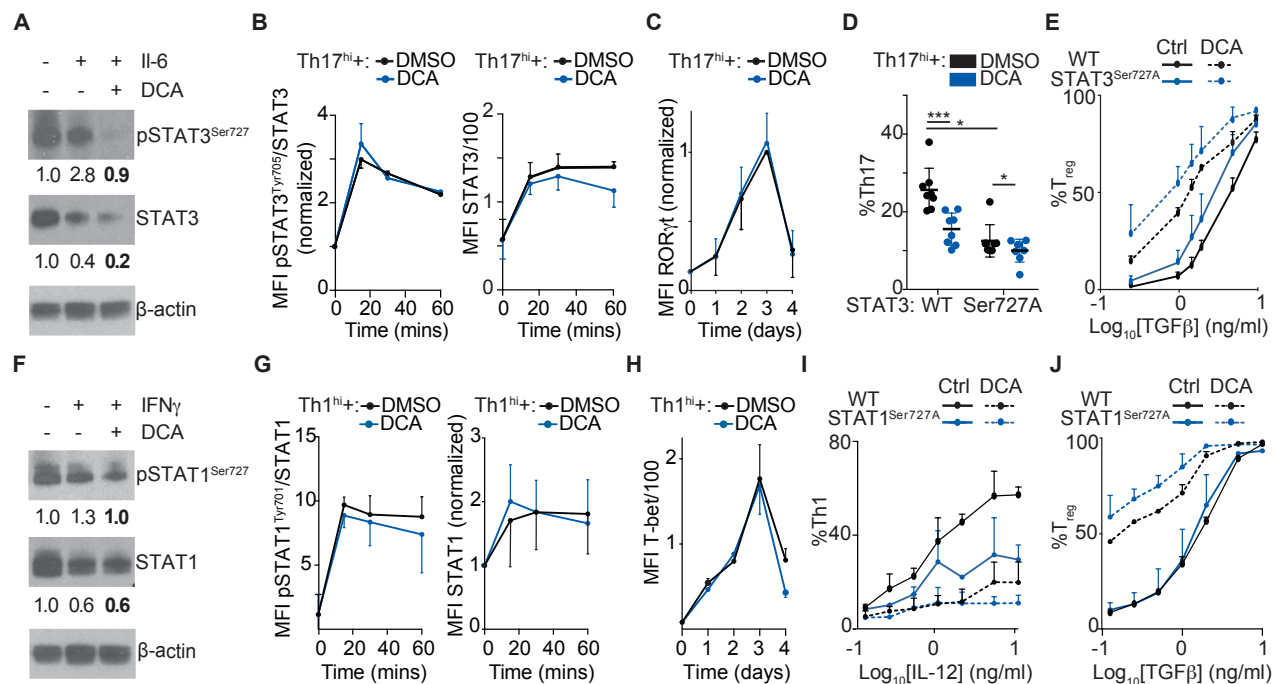

20

21

22

23

24

25

26

27

28

29

30

31

32

33

34

## DCA regulates T cell differentiation independently of STAT1/STAT3 Ser727

**phosphorylation.** (A) Effect of DCA on IL-6-induced STAT3<sup>Ser727</sup> phosphorylation in resting murine CD4<sup>+</sup> T cells (representative of 2 independent experiments). (B-C) Effect of DCA on phospho-STAT3<sup>Tyr705</sup> and total STAT3 (B, n = 2, x2 experiments) and RORγt (C, n = 3, x3 experiments) in murine CD4<sup>+</sup> T cells cultured in Th17<sup>hi</sup> conditions. (D-E) Effect of DCA on Th17 (D) and T<sub>reg</sub> (E) differentiation in STAT3<sup>Ser727Ala</sup> naïve murine CD4<sup>+</sup> T cells. (n = 8, x3 experiments). (F) Effect of DCA on IFNγ-induced STAT1<sup>Ser727</sup> phosphorylation in resting murine CD4<sup>+</sup> T cells (representative of 2 independent experiments). (G-H) Effect of DCA on phospho-STAT1<sup>Tyr705</sup> and total STAT1 (G, n = 2, x2 experiments) and T-bet (H, n = 3, x3 experiments) in murine CD4<sup>+</sup> T cells cultured in Th1<sup>hi</sup> conditions. (I-J) Effect of DCA on Th1 (I) and T<sub>reg</sub> (J) differentiation in STAT1<sup>Ser727Ala</sup> naïve murine CD4<sup>+</sup> T cells (n = 4, x2 experiments). Mann-Whitney \* P<0.05, \*\* P<0.01, \*\*\* P<0.001.

# Fig.5.

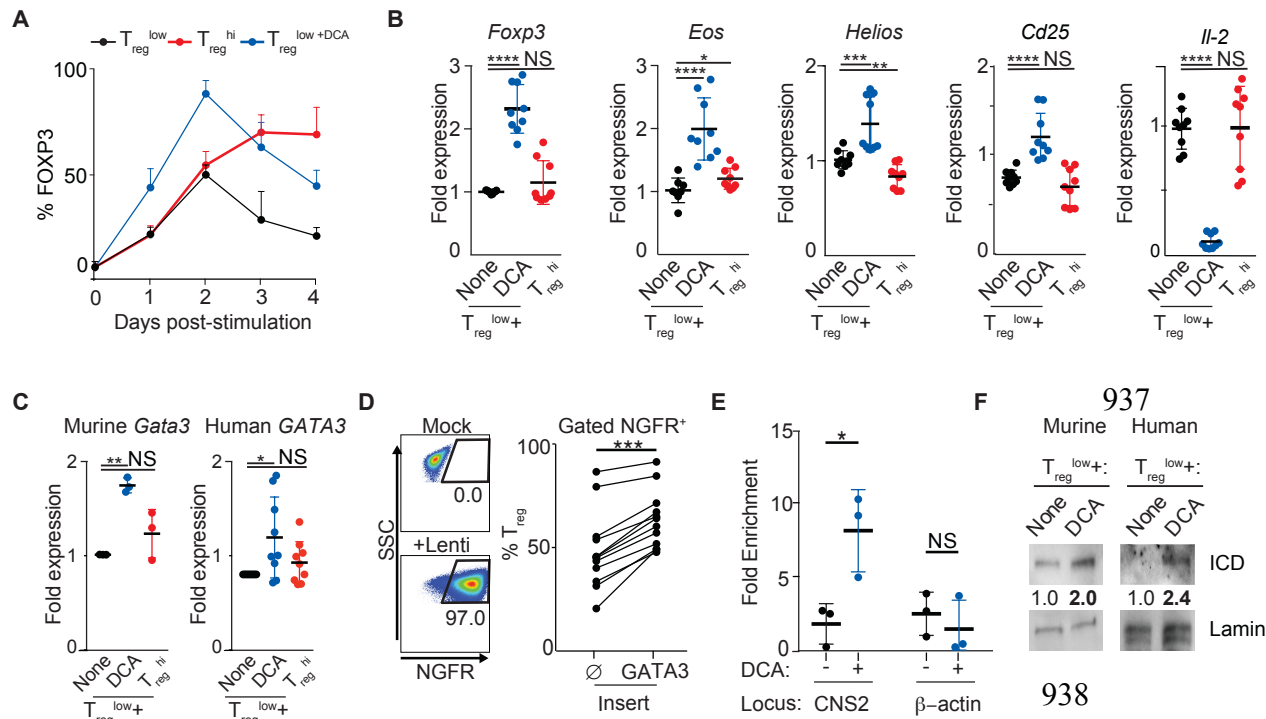

39

## DCA drives novel early FOXP3 expression via a novel CDK8-Notch-GATA3 pathway. (A)

Timecourse of FOXP3 expression in murine CD4<sup>+</sup> T cells cultured in T<sub>reg</sub><sup>low</sup>, T<sub>reg</sub><sup>low+DCA</sup> and T<sub>reg</sub><sup>hi</sup> conditions (n = 10, x5 experiments). (B) Effect of DCA on expression of FOXP3-regulated genes in murine CD4<sup>+</sup> T cells cultured for 2 days in T<sub>reg</sub><sup>low</sup> conditions (n = 9, x3 experiments). (C) Effect of DCA on *Gata3* expression in murine (n = 3, x3 experiments) and human (n = 9, x3 experiments) CD4<sup>+</sup> T cells, cultured for 2 days in T<sub>reg</sub><sup>low</sup> conditions. (D) Effect of overexpressing GATA3, using transduction of either NGFR-T2A-GATA3 or NGFR control lentivirus, on T<sub>reg</sub> differentiation in human CD4<sup>+</sup> T cells cultured in T<sub>reg</sub><sup>low</sup> conditions (n = 12, x3 experiments). (E) ChIP-qPCR quantitation of how DCA treatment impacts GATA3 binding to FOXP3 CNS2 in human CD4<sup>+</sup> T cells, cultured for 2 days in T<sub>reg</sub><sup>low</sup> conditions (n = 3, x3 experiments).  $\beta$ -actin is included as a control locus. (F) Effect of DCA on intranuclear levels of Notch intracellular domain (ICD), normalized to nuclear Lamin B1 levels, in murine and human CD4<sup>+</sup> T cells stimulated for 2 hours in indicated conditions (representative of ≥2 independent experiments).

53 Mann-Whitney (B), Wilcoxon matched pair analysis (C-D) and paired t-test (E), \*  $P < 0.05$ , \*\*

54  $P < 0.01$ , \*\*\*  $P < 0.001$  \*\*\*\* $P < 0.0001$ .

55
